# Supplementary material for: Does Severity of Hair Loss Matter? Factors Associated with Mental Health Outcomes in Women Irradiated for Tinea Capitis in Childhood
Source: PubMed Central journal article supplement (PMC7601621; doi:10.3390/ijerph17207388), 2020-10-10
Supplement: ijerph-17-07388-s001.pdf [file ijerph-17-07388-s001.pdf]

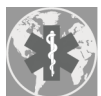

**Table 1.** Rates of health problems among women with hair loss compared to women in the general population in Israel.

|              | Hair loss    | General population: ages 45-54 |            |                       | General population: ages 55-64 |            |                  |
|--------------|--------------|--------------------------------|------------|-----------------------|--------------------------------|------------|------------------|
|              |              | % (n)                          | $\chi^2$   | RR (95% CI)           | % (n)                          | $\chi^2$   | RR (95% CI)      |
| Migraines    | 60.4% (1501) | 11.5% (128) [1]                | 5847.20*** | 5.25 (4.45<br>6.20)   | 9.6% (81)                      | 7400.73*** | 6.29 (5.10 7.75) |
| Diabetes     | 17.8% (436)  | 8.1% (39) [2]                  | 311.45***  | 2.21 (1.61<br>3.01)   | 14.2% (63)                     | 26.57***   | 1.26 (0.98 1.61) |
| Hypertension | 22.3% (541)  | 15.8% (76) [2]                 | 91.34***   | 1.42 (1.14<br>1.76)   | 31.2%<br>(139)                 | 89.14***   | 0.72 (0.61 0.84) |
| Cancer       | 40.8% (1006) | 2.2% (11) [2]                  | 7172.85*** | 17.90 (9.96<br>32.17) | 8.8% (39)                      | 3253.90*** | 4.66 (3.44 6.32) |

|              | General population: ages 65+ |            |                  |
|--------------|------------------------------|------------|------------------|
|              | % (n)                        | $\chi^2$   | RR (95% CI)      |
| Migraines    | 8.6% (49) [1]                | 8488.18*** | 6.80 (5.33 9.14) |
| Diabetes     | 20.5% (109) [2]              | 10.61*     | 0.87 (0.72 1.05) |
| Hypertension | 52.6% (280) [2]              | 888.78***  | 0.42 (0.38 0.47) |
| Cancer       | 13.6% (72) [2]               | 1557.12*** | 3.01 (2.42 3.76) |

Note. . \*  $p < .05$ , \*\*\*  $P < .001$ . RR = relative risk; 95% CI = 95% confidence interval. Superscript numbers <sup>1,2</sup> represent the references in the References list from which the data on the general population of women in Israel was extracted: [1] Israeli National Health Interview Survey (INHIS-1), 2003-2004: selected findings. (2006). Israel Center for Disease Control, Ministry of Health; [2] Israel National Health Interview Survey (INHIS-3), 2013-2015: selected findings. (2017). Israel Center for Disease Control, Ministry of Health.

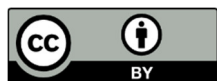

© 2020 by the authors. Licensee MDPI, Basel, Switzerland. This article is an open access article distributed under the terms and conditions of the Creative Commons Attribution (CC BY) license (<http://creativecommons.org/licenses/by/4.0/>).
